# Supplementary material for: An ultrastable, flexible POM-based coordination polymer with redox properties
Source: Royal Society of Chemistry journal article supplement (doi:10.1039/c4ce01123f), 2014-01-01
Supplement: c4ce01123f1.pdf [file c4ce01123f1.pdf]

## Supporting Information

### **An ultrastable, flexible POM-based coordination polymer with redox properties**

**Yu-Hui Luo, Xin-Xin Lu and Hong Zhang**

*Institute of Polyoxometalate Chemistry, Department of Chemistry, Northeast Normal University,*

*Changchun, Jilin 130024, P. R. China*

*\* E-mail: zhangh@nenu.edu.cn (H. Zhang)*

## Experimental section

**General information.** All reagents and solvents were purchased from commercial sources and used without further purification. Powder X-ray diffraction (PXRD) patterns were collected on a Rigaku  $D_{\max}$  2000 X-ray diffractometer with graphite monochromatized Cu  $K\alpha$  radiation ( $\lambda = 0.154$  nm). The FT-IR spectrum was measured in KBr pellets in the range 4000–400  $\text{cm}^{-1}$  on a Mattson Alpha-Centauri spectrometer. Elemental analysis (EA) for C, H and N was performed on a Perkin-Elmer 2400 Elemental Analyzer. Thermogravimetric analysis (TGA) was performed on a Perkin-Elmer Thermal Analyzer under nitrogen atmosphere at a heating rate of 10  $^{\circ}\text{C min}^{-1}$ . Cyclic voltammograms were obtained by a CHI 660 electrochemical workstation at room temperature. Platinum gauze was used as counter electrode, and an Ag/AgCl electrode as the reference electrode.

**X-Ray crystallography.** Crystallographic diffraction data for **1** was recorded on a Bruker Apex CCD diffractometer with graphite monochromatized Mo- $K\alpha$  radiation ( $\lambda = 0.71073$  Å) at 293k. The structure was solved by Direct Method of SHELXS-97 and refined by full-matrix least-squares techniques using the SHELXL-97 program.<sup>1</sup> All non-hydrogen atoms were refined with anisotropic temperature parameters. All hydrogen atoms on organic ligands were placed in geometrically idealized position as a riding mode. The water hydrogen atoms were located from difference Fourier maps. The solvent water molecules in the crystal are highly disordered and are removed by using the SQUEEZE routine of PLATON.<sup>2</sup> The crystallographic data for **1** is summarized in Table 1, and the selected bond lengths and angles are listed in Table S3.

**Table S1.** Crystal data and structure refinements for **1**.

| Compounds      | <b>1</b>                                                               |
|----------------|------------------------------------------------------------------------|
| Formula        | $\text{C}_{36}\text{H}_{49}\text{CuN}_{12}\text{O}_{48}\text{PW}_{12}$ |
| Fw             | 3718.42                                                                |
| Temp (K)       | 293(2)                                                                 |
| Wavelength (Å) | 0.71073                                                                |
| Crystal system | Monoclinic                                                             |
| Space group    | $C2/c$                                                                 |
| $a$ (Å)        | 37.962(9)                                                              |
| $b$ (Å)        | 21.391(4)                                                              |
| $c$ (Å)        | 24.996(4)                                                              |
| $\alpha$ (deg) | 90                                                                     |
| $\beta$ (deg)  | 119.840(4)                                                             |
| $\gamma$ (deg) | 90                                                                     |

|                                             |                |
|---------------------------------------------|----------------|
| $V$ (Å <sup>3</sup> )                       | 17607(6)       |
| $Z$                                         | 8              |
| Reflns coll./unique                         | 44611/15510    |
| $R_{\text{int}}$                            | 0.0772         |
| GOF                                         | 1.028          |
| $R1, wR2$ [ $I > 2\sigma(I)$ ] <sup>a</sup> | 0.0763, 0.2168 |
| $R1, wR2$ (all data) <sup>a</sup>           | 0.1202, 0.2394 |

$$^a R_1 = \frac{\sum ||F_o| - |F_c||}{\sum |F_o|}; wR_2 = \frac{\sum [w(F_o^2 - F_c^2)^2]}{\sum [w(F_o^2)^2]}^{1/2}.$$

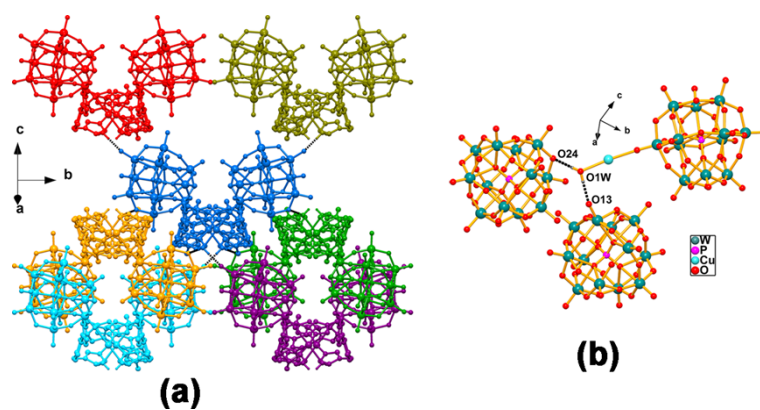

**Fig. S1** (a) The chains are connected by hydrogen-bonds to generate a 3D supramolecular architecture. (b) Representation of O1W $\cdots$ O24 and O1W $\cdots$ O13 hydrogen-bonding interactions.

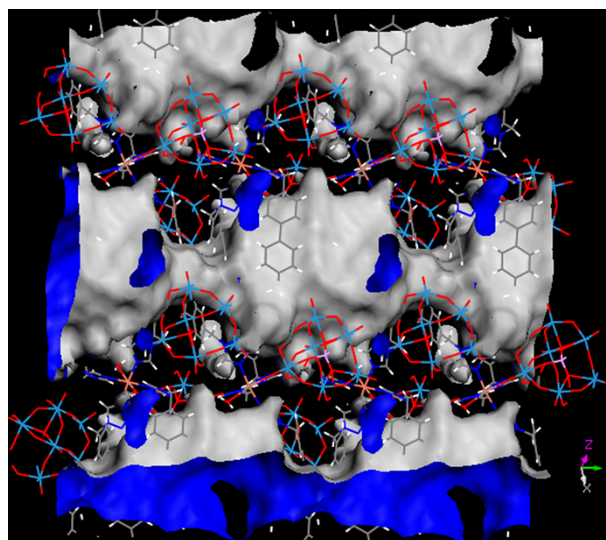

**Fig. S2** View of the 1D channels. Connolly surface (blue internal and gray external) is created with a spherical probe with 1.6 Å radius. The PCP framework is represented as wires and sticks.

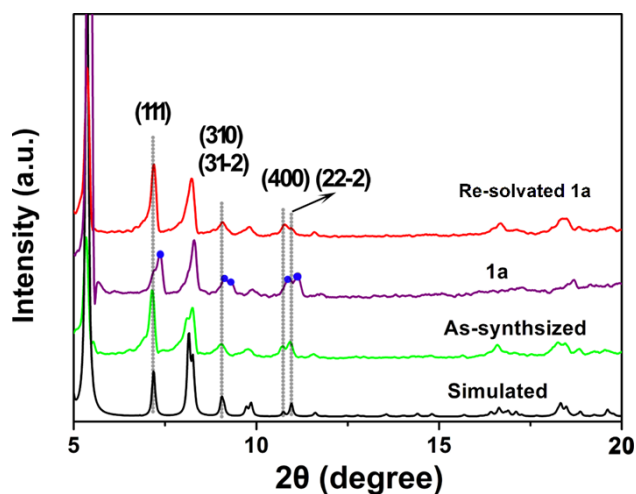

**Fig. S3** PXR D experiments show that part of diffraction peaks of **1a** shift to the higher angle and these peaks of re-solvated **1a** can turn back after immersed in water for 10 hours.

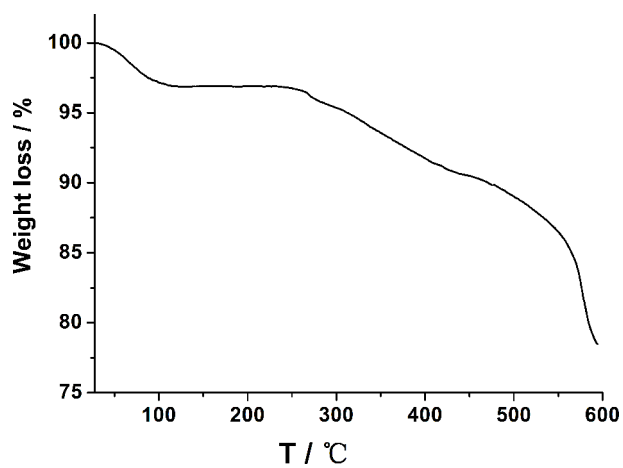

**Fig. S4** The TGA curve of **1**.

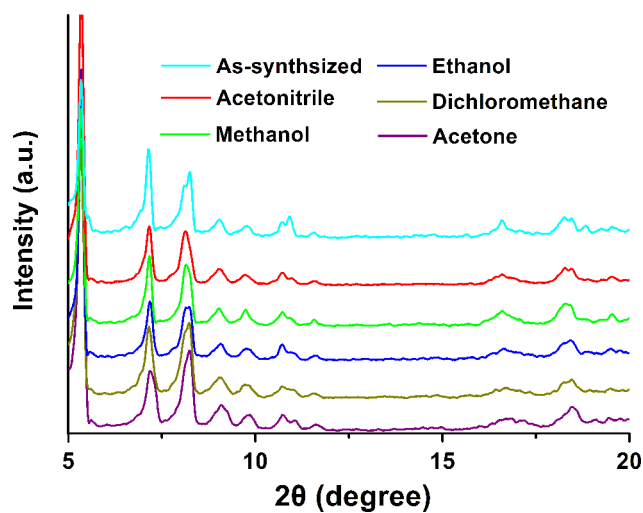

**Fig. S5** PXR D patterns for as-synthesized **1** and crystals of **1** after soaking in different organic solvents for 24 hours.

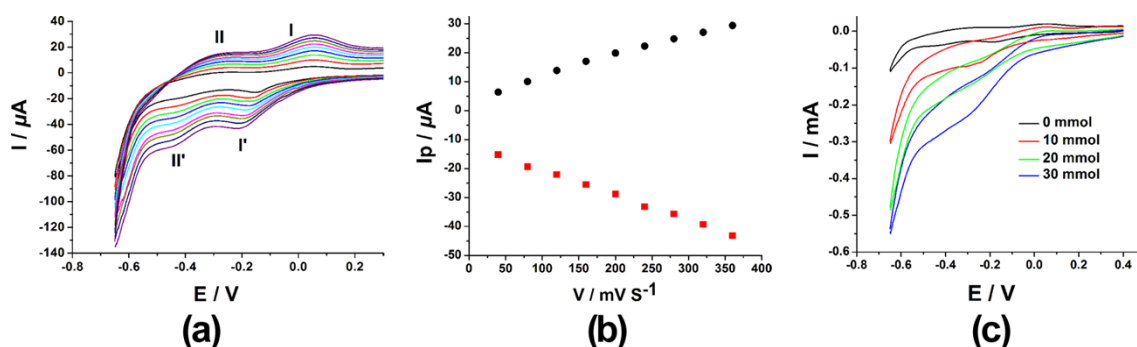

**Fig. S6** (a) Cyclic voltammograms of **1**-CPE in 1 mol L<sup>-1</sup> H<sub>2</sub>SO<sub>4</sub> solution at different scan rates (from inner to outer: 40, 80, 120, 160, 200, 240, 280, 320 and 360 mV s<sup>-1</sup>). (b) The cathodic peak (I) and anodic peak (I') currents of **1**-CPE were proportional to the scan rate. (c) Cyclic voltammograms of **1**-CPE in 1 mol L<sup>-1</sup> H<sub>2</sub>SO<sub>4</sub> solution containing 0.0-30.0 mmol L<sup>-1</sup> NaNO<sub>2</sub>. Scan rate: 200 mV s<sup>-1</sup>.

**Table S2.** Hydrogen-bonding geometry parameters for compound **1**.

| D-H...A        | Symmetry code       | d(D-H)<br>(Å) | d(H...A)<br>(Å) | d(D...A)<br>(Å) | <(DHA)<br>(°) |
|----------------|---------------------|---------------|-----------------|-----------------|---------------|
| O1W-H1WA...O24 | 0.5-x, 0.5+y, 0.5-z | 0.85          | 2.10            | 2.95(2)         | 179           |
| O1W-H1WB...O13 | x, -y, 0.5+z        | 0.85          | 1.96            | 2.81(3)         | 179           |
| C3-H3A...O6    | 0.5-x, 0.5-y, -z    | 0.97          | 2.39            | 3.24(4)         | 146           |
| C15-H15...O29  | 0.5-x, 0.5+y, 0.5-z | 0.93          | 2.42            | 3.33(5)         | 164           |
| C16-H16B...O16 | 0.5+x, 0.5+y, 1+z   | 0.97          | 2.32            | 3.27(4)         | 168           |

**Table S3.** Selected bond lengths (Å) and angles (°) of **1**.<sup>a</sup>

|                        |           |                      |           |
|------------------------|-----------|----------------------|-----------|
| Cu(1)-N(10)#1          | 2.05(3)   | Cu(1)-N(4)           | 2.08(3)   |
| Cu(1)-N(7) #1          | 2.06(2)   | Cu(1)-O(40)          | 2.410(15) |
| Cu(1)-N(1)             | 2.07(3)   | Cu(1)-O(1W)          | 2.416(18) |
| N(10) #1-Cu(1)-N(7) #1 | 88.0(10)  | N(4)-Cu(1)-O(1W)     | 96.6(10)  |
| N(10) #1-Cu(1)-N(1)    | 93.0(10)  | O(40)-Cu(1)-O(1W)    | 172.0(6)  |
| N(7) #1-Cu(1)-N(1)     | 171.9(11) | N(7) #1-Cu(1)-O(40)  | 85.4(8)   |
| N(10) #1-Cu(1)-N(4)    | 176.0(12) | N(1)-Cu(1)-O(40)     | 86.6(9)   |
| N(7) #1-Cu(1)-N(4)     | 91.3(10)  | N(4)-Cu(1)-O(40)     | 87.5(10)  |
| N(1)-Cu(1)-N(4)        | 87.1(11)  | N(10) #1-Cu(1)-O(1W) | 87.3(9)   |
| N(10) #1-Cu(1)-O(40)   | 88.4(10)  | N(7) #1-Cu(1)-O(1W)  | 87.7(8)   |
| N(1)-Cu(1)-O(1W)       | 100.3(9)  |                      |           |

<sup>a</sup> Symmetry codes: #1, -0.5+x, 0.5-y, -0.5+z.

## References:

- 1 (a) G. M. Sheldrick, *SHELXS-97: Programs for X-ray Crystal Structure Solution*, University of Göttingen: Göttingen, Germany, 1997; (b) G. M. Sheldrick, *SHELXL-97: Programs for X-ray Crystal Structure Refinement*, University of Göttingen: Göttingen, Germany, 1997.

2 A. L. Spek, *J. Appl. Crystallogr.*, 2003, **36**, 7.
